# Supplementary material for: Highly Efficient n-Type Doping of Graphene by Vacuum Annealed Amine-Rich Macromolecules
Source: MDPI journal article supplement (doi:10.3390/ma13092166), 2020-05-08
Supplement: s1 [file s1]

# Highly Efficient *n*-type Doping of Graphene by Vacuum Annealed Amine-rich Macromolecules

Young-Min Seo <sup>1</sup>, Wonseok Jang <sup>1</sup>, Taejun Gu <sup>1</sup> and Dongmok Whang <sup>1,2\*</sup>

<sup>1</sup> School of Advanced Materials Science & Engineering, Sungkyunkwan University, Suwon 16419, Korea; black4504@skku.edu (Y.-M.S.); wid0129@skku.edu (W.J.); gtj1008@skku.edu (T.G.)

<sup>2</sup> SKKU Advanced Institute of Nanotechnology (SAINT), Sungkyunkwan University, Suwon 16419, Korea

\* Correspondence: dwhang@skku.edu

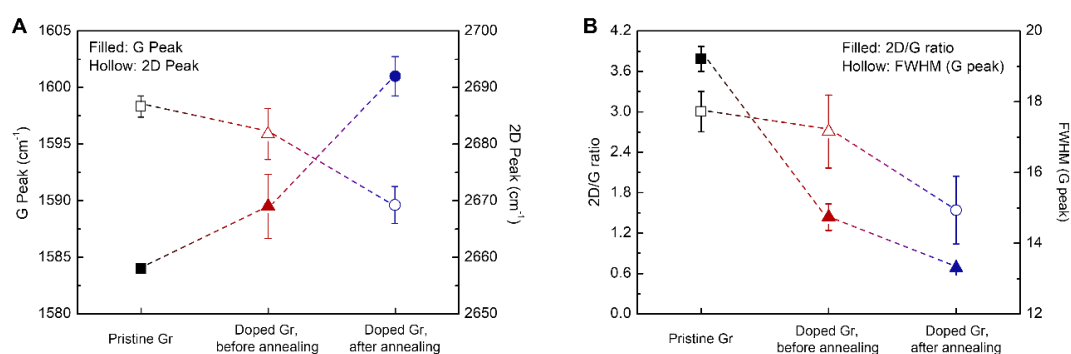

**Figure S1.** Raman spectra of graphene before/after doping&vacuum annealing. (A) Position of G and 2D peak of each graphene. (B) 2D/G ratio and full width half maximum (FWHM) of G peak of each graphene.

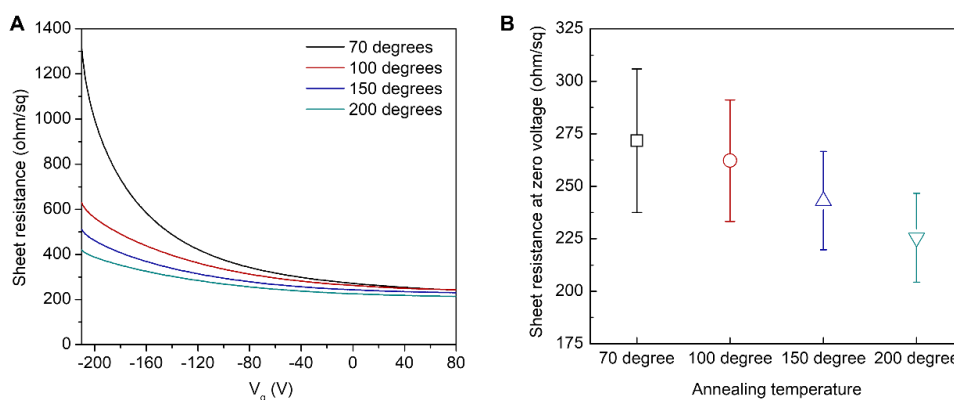

**Figure S2.** Changes in GFETs characteristics according to annealing temperature. (A) Gate-dependent electrical property of PEI doped GFETs characteristics according to annealing temperature. (B) Changes in sheet resistance of PEI doped GFETs according to annealing temperature.

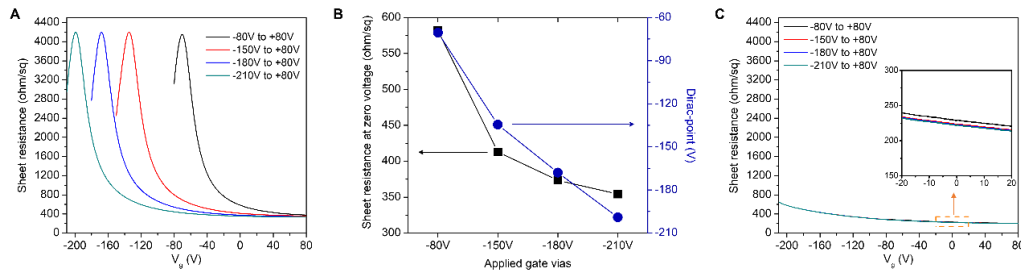

**Figure S3.** Changes in GFETs characteristics according to gate voltage before and after vacuum annealing. (A) Gate-dependent electrical property of PEI doped GFETs characteristics depending on the gate sweep range before annealing. (B) Changes in sheet resistance and Dirac-point of GFETs by applied gate voltage. (C) Gate-dependent electrical property of PEI doped GFETs characteristics depending on the gate sweep range after annealing. Inset is enlarged graph of the orange dash line.

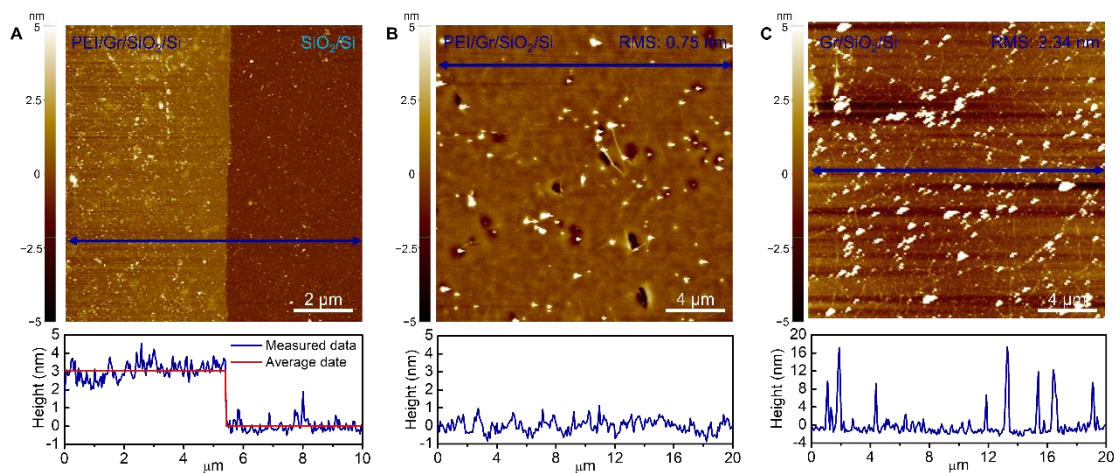

**Figure S4.** Atomic force microscope (AFM) analysis of surface height and uniformity. Each graph under the images are surface roughness of blue arrow lines on the image. (A) Thickness of PEI/Gr structure on SiO<sub>2</sub>/Si b. Since the thickness of graphene is 0.3 nm, the thickness of PEI is less than 3 nm. (B) Roughness of PEI /Gr/SiO<sub>2</sub>/Si. (C) Roughness of Gr on SiO<sub>2</sub>/Si.

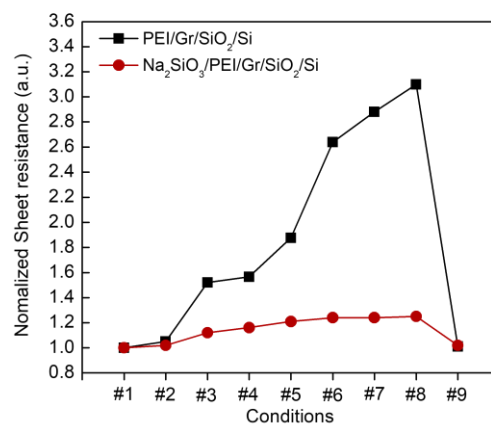

**Figure S5.** Sheet resistance change in air atmosphere before and after passivation of PEI doped GFET. Sodium metasilicate used as a passivation layer was diluted (5 wt %) in Di, spin-coated (3000 rpm) on PEI/Gr/SiO<sub>2</sub>/Si and baked on a hot plate for 120 °C and 20 min to form a film. #1 condition was measured on vacuum and #2, 3, 4~8 was 1 h, 24 h, 48 h, 72 h, 7 days, 10 days, 14 days later respectively. #9 was after re-annealed each devices at 150 °C, for 2 h.
